# Supplementary material for: Effect of aromatic ring fluorination on CH⋯π interactions: microwave spectrum and structure of the 1,2-difluorobenzene⋯acetylene dimer
Source: Royal Society of Chemistry journal article supplement (doi:10.1039/c6cp04737h), 2016-01-01

## —Electronic Supplementary Information—

### Effect of aromatic ring fluorination on CH... $\pi$

### interactions: Microwave spectrum and structure of the 1,2-difluorobenzene...acetylene dimer

Anuradha G. Akmeemana, Justin M. Kang, Rachel E. Dorris, Rebecca D. Nelson, Ashley M. Anderton, Rebecca A. Peebles, Sean A. Peebles, Nathan A. Seifert, Brooks H. Pate

**Table S1** Rotational constants, dipole moment components and relative energies of the planar form of 1,2-DFBZ...HCCH (relative to the non-planar form at each level).

**Table S2** Observed transition frequencies for all isotopologues of 1,2-DFBZ...HCCH.

**Table S2a** Rotational transition frequencies for parent isotopic species of 1,2-difluorobenzene...HCCH complex.

**Table S2b** Rotational transition frequencies for  $^{13}\text{C}_1$  isotopic species of 1,2-difluorobenzene...HCCH complex.

**Table S2c** Rotational transition frequencies for  $^{13}\text{C}_2$  isotopic species of 1,2-difluorobenzene...HCCH complex.

**Table S2d** Rotational transition frequencies for  $^{13}\text{C}_3$  isotopic species of 1,2-difluorobenzene...HCCH complex.

**Table S2e** Rotational transition frequencies for  $^{13}\text{C}_{12}$  isotopic species of 1,2-difluorobenzene...HCCH complex.

**Table S2f** Rotational transition frequencies for  $^{13}\text{C}_{13}$  isotopic species of 1,2-difluorobenzene...HCCH complex.

**Table S2g** Rotational transition frequencies for the 1,2-difluorobenzene...DCCD isotopic species.

**Table S3** Principal axis coordinates of 1,2-DFBZ...HCCH and estimated uncertainties resulting from least-squares fit of moments of inertia.

**Table S4**  $\omega\text{B97X-D/aug-cc-pVDZ}$  (BSSE corrected) predicted principal axis coordinates ( $\text{\AA}$ ) of the non-planar and planar forms of 1,2-DFBZ...HCCH.

**Table S4a** Predicted non-planar form of 1,2-DFBZ...HCCH.

**Table S4b** Predicted planar form of 1,2-DFBZ...HCCH.

**Table S1** Rotational constants, dipole moment components and relative energies of the planar form of 1,2-DFBZ...HCCH (relative to the non-planar form at each level).  $\mu_c$  is zero by symmetry. Values in parentheses give the results for BSSE corrected optimizations. <sup>a)</sup>

|                                  | MP2/<br>6-311++G(2d,2p) | MP2/<br>aug-cc-pvdz | M06-2X/<br>6-311++G(2d,2p) | M06-2X/<br>aug-cc-pvdz | $\omega$ B97X-D/<br>6-311++G(2d,2p) | $\omega$ B97X-D/<br>aug-cc-pvdz |
|----------------------------------|-------------------------|---------------------|----------------------------|------------------------|-------------------------------------|---------------------------------|
| <i>A</i> / MHz                   | 2150.3(2157.3)          | 2114.0(2119.2)      | 2172.7(2174.1)             | 2158.2(2157.1)         | 2168.6(2169.0)                      | 2147.7(2146.5)                  |
| <i>B</i> / MHz                   | 711.0(688.6)            | 715.5(683.8)        | 723.8(720.1)               | 722.1(715.1)           | 710.0(707.4)                        | 711.8(702.3)                    |
| <i>C</i> / MHz                   | 534.3(522.0)            | 534.6(517.0)        | 542.9(540.9)               | 541.1(537.1)           | 534.9(533.4)                        | 534.6(529.1)                    |
| $\mu_a$ / D                      | 0.29(0.36)              | 0.25(0.37)          | 0.32(0.32)                 | 0.33(0.33)             | 0.21(0.21)                          | 0.19                            |
| $\mu_b$ / D                      | 2.65(2.65)              | 2.71(2.69)          | 2.68(2.69)                 | 2.67(2.67)             | 2.65(2.65)                          | 2.66                            |
| $\Delta E$ / cm <sup>-1 a)</sup> | 489(234)                | 663(243)            | 298(219)                   | 331(236)               | 253(206)                            | 293(218)                        |

<sup>a)</sup>  $\Delta E$  is the relative energy of the planar form with respect to the non-planar form calculated with the same level and basis set.

**Table S2** Observed transition frequencies for all isotopologues of 1,2-DFB...HCCH.**Table S2a** Rotational transition frequencies for parent isotopic species of 1,2-difluorobenzene...HCCH complex

| $J'$ | $K_a'$ | $K_c'$ | $J''$ | $K_a''$ | $K_c''$ | $\nu_{\text{obs}} / \text{MHz}$ | $\nu_{\text{obs}} - \nu_{\text{calc}} / \text{MHz}$ |
|------|--------|--------|-------|---------|---------|---------------------------------|-----------------------------------------------------|
| 3    | 2      | 2      | 2     | 2       | 1       | 6113.7585                       | -0.0014                                             |
| 3    | 1      | 2      | 2     | 1       | 1       | 6302.3277                       | 0.0007                                              |
| 3    | 2      | 1      | 2     | 2       | 0       | 6310.4284                       | -0.0018                                             |
| 3    | 2      | 2      | 2     | 1       | 1       | 6769.8473                       | 0.0005                                              |
| 4    | 2      | 2      | 3     | 3       | 1       | 7205.2467                       | -0.0035                                             |
| 3    | 2      | 1      | 2     | 1       | 2       | 7496.6987                       | -0.0020                                             |
| 3    | 3      | 1      | 2     | 2       | 0       | 7572.8438                       | -0.0005                                             |
| 3    | 3      | 0      | 2     | 2       | 1       | 7647.2727                       | -0.0004                                             |
| 4    | 0      | 4      | 3     | 1       | 3       | 7734.5482                       | 0.0002                                              |
| 4    | 1      | 4      | 3     | 1       | 3       | 7751.4884                       | 0.0025                                              |
| 4    | 0      | 4      | 3     | 0       | 3       | 7784.4398                       | 0.0009                                              |
| 4    | 1      | 4      | 3     | 0       | 3       | 7801.3768                       | 0.0000                                              |
| 4    | 1      | 3      | 3     | 2       | 2       | 7830.6180                       | -0.0004                                             |
| 4    | 3      | 2      | 3     | 3       | 1       | 8236.5499                       | -0.0008                                             |
| 5    | 3      | 3      | 4     | 4       | 0       | 8268.5027                       | 0.0031                                              |
| 4    | 1      | 3      | 3     | 1       | 2       | 8298.1368                       | -0.0014                                             |
| 5    | 2      | 4      | 4     | 3       | 1       | 8310.5701                       | -0.0024                                             |
| 4    | 3      | 1      | 3     | 3       | 0       | 8317.7960                       | 0.0049                                              |
| 4    | 2      | 2      | 3     | 2       | 1       | 8467.6647                       | 0.0005                                              |
| 4    | 2      | 3      | 3     | 1       | 2       | 8571.0655                       | 0.0010                                              |
| 4    | 3      | 2      | 3     | 2       | 1       | 9498.9648                       | 0.0000                                              |
| 5    | 2      | 3      | 4     | 3       | 2       | 9538.3610                       | -0.0003                                             |
| 5    | 0      | 5      | 4     | 1       | 4       | 9636.7337                       | -0.0016                                             |
| 5    | 1      | 5      | 4     | 1       | 4       | 9641.8660                       | -0.0004                                             |
| 5    | 0      | 5      | 4     | 0       | 4       | 9653.6730                       | -0.0002                                             |
| 5    | 1      | 5      | 4     | 0       | 4       | 9658.8055                       | 0.0012                                              |
| 6    | 2      | 5      | 5     | 3       | 2       | 9786.7401                       | 0.0038                                              |
| 4    | 3      | 1      | 3     | 2       | 2       | 9851.3033                       | -0.0011                                             |
| 5    | 1      | 4      | 4     | 2       | 3       | 9931.0595                       | -0.0013                                             |
| 5    | 2      | 4      | 4     | 2       | 3       | 10058.3298                      | -0.0023                                             |
| 4    | 2      | 2      | 3     | 1       | 3       | 10117.7738                      | -0.0027                                             |
| 5    | 1      | 4      | 4     | 1       | 3       | 10203.9853                      | -0.0019                                             |
| 4    | 4      | 1      | 3     | 3       | 0       | 10232.3297                      | -0.0006                                             |
| 4    | 4      | 0      | 3     | 3       | 1       | 10250.7285                      | 0.0016                                              |
| 5    | 3      | 3      | 4     | 3       | 2       | 10282.6758                      | 0.0000                                              |
| 5    | 2      | 4      | 4     | 1       | 3       | 10331.2581                      | -0.0003                                             |
| 5    | 4      | 1      | 4     | 4       | 0       | 10339.3433                      | 0.0025                                              |
| 5    | 3      | 2      | 4     | 3       | 1       | 10504.7793                      | 0.0029                                              |
| 5    | 2      | 3      | 4     | 2       | 2       | 10569.6616                      | -0.0002                                             |
| 6    | 3      | 3      | 5     | 4       | 2       | 10973.8178                      | -0.0004                                             |

|   |   |   |   |   |   |            |         |
|---|---|---|---|---|---|------------|---------|
| 4 | 3 | 2 | 3 | 0 | 3 | 11198.9695 | 0.0016  |
| 5 | 3 | 3 | 4 | 2 | 2 | 11313.9774 | 0.0011  |
| 6 | 0 | 6 | 5 | 1 | 5 | 11523.5298 | -0.0029 |
| 6 | 1 | 6 | 5 | 1 | 5 | 11524.9788 | -0.0014 |
| 6 | 0 | 6 | 5 | 0 | 5 | 11528.6635 | -0.0003 |
| 6 | 1 | 6 | 5 | 0 | 5 | 11530.1102 | -0.0010 |
| 6 | 2 | 4 | 5 | 3 | 3 | 11840.4148 | 0.0009  |
| 6 | 1 | 5 | 5 | 2 | 4 | 11931.6647 | 0.0001  |
| 6 | 2 | 5 | 5 | 1 | 4 | 12108.2115 | 0.0000  |
| 5 | 4 | 2 | 4 | 3 | 1 | 12230.0496 | -0.0018 |
| 5 | 3 | 2 | 4 | 2 | 3 | 12252.5377 | 0.0017  |
| 5 | 4 | 1 | 4 | 3 | 2 | 12353.5159 | -0.0011 |
| 6 | 2 | 4 | 5 | 2 | 3 | 12584.7276 | -0.0008 |
| 6 | 3 | 3 | 5 | 3 | 2 | 12699.0922 | -0.0009 |
| 5 | 5 | 1 | 4 | 4 | 0 | 12871.6414 | 0.0023  |
| 5 | 5 | 0 | 4 | 4 | 1 | 12875.4429 | 0.0027  |
| 6 | 3 | 4 | 5 | 2 | 3 | 13041.3767 | 0.0017  |
| 7 | 0 | 7 | 6 | 1 | 6 | 13404.4738 | 0.0015  |
| 7 | 0 | 7 | 6 | 0 | 6 | 13405.9182 | -0.0017 |
| 7 | 1 | 7 | 6 | 0 | 6 | 13406.3105 | 0.0021  |
| 7 | 3 | 4 | 6 | 4 | 3 | 13411.9367 | 0.0025  |
| 7 | 1 | 6 | 6 | 2 | 5 | 13863.4311 | -0.0001 |
| 7 | 2 | 6 | 6 | 2 | 5 | 13880.2639 | 0.0002  |
| 7 | 2 | 6 | 6 | 1 | 5 | 13929.5370 | -0.0023 |
| 7 | 2 | 5 | 6 | 3 | 4 | 14041.1465 | -0.0001 |
| 6 | 4 | 3 | 5 | 3 | 2 | 14121.3640 | -0.0013 |
| 7 | 3 | 5 | 6 | 3 | 4 | 14272.2913 | -0.0017 |
| 7 | 4 | 4 | 6 | 4 | 3 | 14460.7914 | -0.0022 |
| 6 | 4 | 2 | 5 | 3 | 3 | 14559.7040 | 0.0016  |
| 7 | 3 | 5 | 6 | 2 | 4 | 14728.9412 | 0.0016  |
| 6 | 3 | 3 | 5 | 2 | 4 | 14893.3002 | 0.0031  |
| 6 | 5 | 2 | 5 | 4 | 1 | 14907.3602 | -0.0009 |
| 6 | 6 | 1 | 5 | 5 | 0 | 15504.6142 | -0.0018 |
| 8 | 2 | 7 | 7 | 1 | 6 | 15782.9885 | 0.0024  |
| 8 | 3 | 5 | 7 | 4 | 4 | 15822.9895 | -0.0017 |
| 8 | 2 | 6 | 7 | 3 | 5 | 16111.4099 | -0.0004 |
| 8 | 3 | 5 | 7 | 3 | 4 | 16871.8517 | 0.0011  |
| 7 | 5 | 3 | 6 | 4 | 2 | 16887.0140 | -0.0011 |
| 7 | 4 | 3 | 6 | 3 | 4 | 16959.8855 | -0.0002 |
| 7 | 5 | 2 | 6 | 4 | 3 | 17041.9824 | -0.0051 |
| 8 | 4 | 5 | 7 | 3 | 4 | 17542.9382 | -0.0002 |
| 7 | 6 | 2 | 6 | 5 | 1 | 17551.1741 | -0.0005 |
| 7 | 6 | 1 | 6 | 5 | 2 | 17558.8644 | 0.0040  |

---

**Table S2b** Rotational transition frequencies for  $^{13}\text{C}_1$  isotopic species of 1,2-difluorobenzene...HCCH complex

| $J'$ | $K_a'$ | $K_c'$ | $J''$ | $K_a''$ | $K_c''$ | $\nu_{\text{obs}} / \text{MHz}$ | $\nu_{\text{obs}} - \nu_{\text{calc}} / \text{MHz}$ |
|------|--------|--------|-------|---------|---------|---------------------------------|-----------------------------------------------------|
| 3    | 2      | 2      | 2     | 1       | 1       | 6710.7912                       | 0.0053                                              |
| 3    | 3      | 1      | 2     | 2       | 0       | 7505.6305                       | 0.0004                                              |
| 3    | 3      | 0      | 2     | 2       | 1       | 7585.1313                       | 0.0005                                              |
| 4    | 0      | 4      | 3     | 1       | 3       | 7676.5403                       | -0.0049                                             |
| 4    | 1      | 4      | 3     | 0       | 3       | 7736.6354                       | -0.0003                                             |
| 5    | 0      | 5      | 4     | 1       | 4       | 9561.1367                       | -0.0016                                             |
| 5    | 1      | 5      | 4     | 0       | 4       | 9580.2658                       | -0.0014                                             |
| 4    | 3      | 1      | 3     | 2       | 2       | 9788.4969                       | -0.0172                                             |
| 5    | 1      | 4      | 4     | 2       | 3       | 9876.3172                       | 0.0087                                              |
| 4    | 4      | 1      | 3     | 3       | 0       | 10142.6642                      | -0.0022                                             |
| 5    | 2      | 4      | 4     | 1       | 3       | 10240.6430                      | 0.0002                                              |
| 5    | 3      | 3      | 4     | 2       | 2       | 11209.8807                      | 0.0153                                              |
| 6    | 0      | 6      | 5     | 1       | 5       | 11431.4397                      | 0.0010                                              |
| 6    | 1      | 6      | 5     | 0       | 5       | 11436.9301                      | -0.0045                                             |
| 5    | 4      | 1      | 4     | 3       | 2       | 12260.3839                      | 0.0122                                              |
| 5    | 5      | 1      | 4     | 4       | 0       | 12758.9378                      | -0.0023                                             |
| 5    | 5      | 0      | 4     | 4       | 1       | 12763.3503                      | -0.0003                                             |
| 6    | 3      | 4      | 5     | 2       | 3       | 12918.6340                      | -0.0116                                             |
| 7    | 0      | 7      | 6     | 1       | 6       | 13296.4713                      | 0.0024                                              |

**Table S2c** Rotational transition frequencies for  $^{13}\text{C}_2$  isotopic species of 1,2-difluorobenzene...HCCH complex

| $J'$ | $K_a'$ | $K_c'$ | $J''$ | $K_a''$ | $K_c''$ | $\nu_{\text{obs}} / \text{MHz}$ | $\nu_{\text{obs}} - \nu_{\text{calc}} / \text{MHz}$ |
|------|--------|--------|-------|---------|---------|---------------------------------|-----------------------------------------------------|
| 3    | 2      | 1      | 2     | 1       | 2       | 7444.1044                       | -0.0038                                             |
| 3    | 3      | 1      | 2     | 2       | 0       | 7531.3027                       | 0.0035                                              |
| 3    | 3      | 0      | 2     | 2       | 1       | 7602.2286                       | -0.0002                                             |
| 4    | 0      | 4      | 3     | 1       | 3       | 7713.3504                       | -0.0044                                             |
| 4    | 1      | 4      | 3     | 0       | 3       | 7781.7659                       | -0.0021                                             |
| 4    | 2      | 3      | 3     | 1       | 2       | 8540.6416                       | 0.0106                                              |
| 4    | 3      | 2      | 3     | 2       | 1       | 9453.4841                       | 0.0005                                              |
| 5    | 0      | 5      | 4     | 1       | 4       | 9612.2107                       | -0.0003                                             |
| 5    | 1      | 5      | 4     | 0       | 4       | 9635.1386                       | -0.0076                                             |
| 4    | 3      | 1      | 3     | 2       | 2       | 9790.0228                       | -0.0032                                             |
| 5    | 1      | 4      | 4     | 2       | 3       | 9891.7107                       | 0.0109                                              |
| 4    | 4      | 1      | 3     | 3       | 0       | 10174.2334                      | -0.0041                                             |
| 4    | 4      | 0      | 3     | 3       | 1       | 10191.4670                      | 0.0002                                              |
| 6    | 0      | 6      | 5     | 1       | 5       | 11495.5234                      | -0.0084                                             |
| 6    | 1      | 6      | 5     | 0       | 5       | 11502.4856                      | 0.0132                                              |
| 6    | 2      | 5      | 5     | 1       | 4       | 12072.5078                      | -0.0124                                             |
| 5    | 4      | 2      | 4     | 3       | 1       | 12166.1403                      | 0.0012                                              |
| 5    | 4      | 1      | 4     | 3       | 2       | 12282.0574                      | 0.0002                                              |
| 5    | 5      | 1      | 4     | 4       | 0       | 12797.6369                      | 0.0009                                              |
| 5    | 5      | 0      | 4     | 4       | 1       | 12801.1332                      | -0.0007                                             |
| 6    | 3      | 4      | 5     | 2       | 3       | 12995.6935                      | 0.0055                                              |
| 7    | 0      | 7      | 6     | 1       | 6       | 13372.8664                      | 0.0023                                              |
| 7    | 2      | 6      | 6     | 1       | 5       | 13888.9920                      | -0.0022                                             |

**Table S2d** Rotational transition frequencies for  $^{13}\text{C}_3$  isotopic species of 1,2-difluorobenzene...HCCH complex

| $J'$ | $K_a'$ | $K_c'$ | $J''$ | $K_a''$ | $K_c''$ | $\nu_{\text{obs}} / \text{MHz}$ | $\nu_{\text{obs}} - \nu_{\text{calc}} / \text{MHz}$ |
|------|--------|--------|-------|---------|---------|---------------------------------|-----------------------------------------------------|
| 3    | 3      | 0      | 2     | 2       | 1       | 7632.4507                       | -0.0063                                             |
| 4    | 0      | 4      | 3     | 1       | 3       | 7725.6685                       | 0.0102                                              |
| 4    | 1      | 3      | 3     | 2       | 2       | 7820.9573                       | 0.0057                                              |
| 4    | 2      | 3      | 3     | 1       | 2       | 8558.6012                       | -0.0006                                             |
| 4    | 3      | 2      | 3     | 2       | 1       | 9482.4004                       | 0.0049                                              |
| 5    | 0      | 5      | 4     | 1       | 4       | 9625.8097                       | 0.0009                                              |
| 5    | 1      | 5      | 4     | 0       | 4       | 9647.8155                       | -0.0004                                             |
| 4    | 3      | 1      | 3     | 2       | 2       | 9832.8700                       | 0.0017                                              |
| 5    | 1      | 4      | 4     | 2       | 3       | 9918.5281                       | -0.0034                                             |
| 4    | 4      | 1      | 3     | 3       | 0       | 10212.4932                      | -0.0006                                             |
| 4    | 4      | 0      | 3     | 3       | 1       | 10230.7830                      | 0.0009                                              |
| 5    | 2      | 4      | 4     | 1       | 3       | 10317.3581                      | -0.0099                                             |
| 6    | 1      | 6      | 5     | 0       | 5       | 11517.1880                      | -0.0025                                             |
| 6    | 1      | 5      | 5     | 2       | 4       | 11916.7310                      | -0.0116                                             |
| 6    | 2      | 5      | 5     | 1       | 4       | 12092.7657                      | -0.0032                                             |
| 5    | 4      | 2      | 4     | 3       | 1       | 12207.7329                      | 0.0093                                              |
| 5    | 5      | 1      | 4     | 4       | 0       | 12846.4659                      | -0.0145                                             |
| 5    | 5      | 0      | 4     | 4       | 1       | 12850.2681                      | 0.0110                                              |
| 7    | 0      | 7      | 6     | 1       | 6       | 13389.6201                      | 0.0098                                              |

**Table S2e** Rotational transition frequencies for  $^{13}\text{C}_{12}$  isotopic species of 1,2-difluorobenzene...HCCH complex

| $J'$ | $K_a'$ | $K_c'$ | $J''$ | $K_a''$ | $K_c''$ | $\nu_{\text{obs}} / \text{MHz}$ | $\nu_{\text{obs}} - \nu_{\text{calc}} / \text{MHz}$ |
|------|--------|--------|-------|---------|---------|---------------------------------|-----------------------------------------------------|
| 3    | 2      | 2      | 2     | 1       | 1       | 6722.6840                       | -0.0074                                             |
| 4    | 0      | 4      | 3     | 1       | 3       | 7630.2659                       | 0.0001                                              |
| 4    | 1      | 4      | 3     | 0       | 3       | 7707.1452                       | 0.0035                                              |
| 4    | 2      | 3      | 3     | 1       | 2       | 8499.6272                       | -0.0007                                             |
| 5    | 0      | 5      | 4     | 1       | 4       | 9510.3172                       | -0.0049                                             |
| 5    | 1      | 5      | 4     | 0       | 4       | 9536.8696                       | -0.0011                                             |
| 4    | 4      | 0      | 3     | 3       | 1       | 10213.0955                      | 0.0057                                              |
| 5    | 2      | 4      | 4     | 1       | 3       | 10232.7443                      | 0.0012                                              |
| 6    | 0      | 6      | 5     | 1       | 5       | 11373.4525                      | 0.0004                                              |
| 6    | 1      | 6      | 5     | 0       | 5       | 11381.7367                      | 0.0073                                              |
| 5    | 5      | 1      | 4     | 4       | 0       | 12829.1241                      | -0.0014                                             |
| 5    | 5      | 0      | 4     | 4       | 1       | 12832.3092                      | -0.0010                                             |
| 7    | 0      | 7      | 6     | 1       | 6       | 13229.9210                      | -0.0022                                             |
| 7    | 1      | 7      | 6     | 0       | 6       | 13232.3389                      | -0.0010                                             |

**Table S2f** Rotational transition frequencies for  $^{13}\text{C}_{13}$  isotopic species of 1,2-difluorobenzene...HCCH complex

| $J'$ | $K_a'$ | $K_c'$ | $J''$ | $K_a''$ | $K_c''$ | $\nu_{\text{obs}} / \text{MHz}$ | $\nu_{\text{obs}} - \nu_{\text{calc}} / \text{MHz}$ |
|------|--------|--------|-------|---------|---------|---------------------------------|-----------------------------------------------------|
| 3    | 2      | 2      | 2     | 1       | 1       | 6710.0940                       | -0.0003                                             |
| 3    | 3      | 1      | 2     | 2       | 0       | 7553.7996                       | -0.0133                                             |
| 4    | 0      | 4      | 3     | 1       | 3       | 7562.8776                       | 0.0025                                              |
| 3    | 3      | 0      | 2     | 2       | 1       | 7615.7975                       | 0.0114                                              |
| 4    | 1      | 4      | 3     | 0       | 3       | 7654.9981                       | 0.0012                                              |
| 4    | 2      | 3      | 3     | 1       | 2       | 8474.0082                       | -0.0019                                             |
| 5    | 0      | 5      | 4     | 1       | 4       | 9432.3381                       | 0.0012                                              |
| 4    | 3      | 2      | 3     | 2       | 1       | 9446.0230                       | 0.0005                                              |
| 5    | 1      | 5      | 4     | 0       | 4       | 9466.1273                       | 0.0024                                              |
| 5    | 1      | 4      | 4     | 2       | 3       | 9660.8808                       | -0.0059                                             |
| 4    | 3      | 1      | 3     | 2       | 2       | 9743.8784                       | 0.0047                                              |
| 5    | 2      | 4      | 4     | 1       | 3       | 10191.0521                      | -0.0034                                             |
| 4    | 4      | 1      | 3     | 3       | 0       | 10209.9835                      | -0.0019                                             |
| 4    | 4      | 0      | 3     | 3       | 1       | 10223.5009                      | -0.0001                                             |
| 5    | 3      | 3      | 4     | 2       | 2       | 11231.9212                      | 0.0016                                              |
| 6    | 0      | 6      | 5     | 1       | 5       | 11282.7041                      | 0.0008                                              |
| 6    | 1      | 6      | 5     | 0       | 5       | 11293.8923                      | 0.0003                                              |



**Table S2g** Rotational transition frequencies for the 1,2-difluorobenzene...DCCD isotopic species

| $J'$ | $K_a'$ | $K_c'$ | $J''$ | $K_a''$ | $K_c''$ | $\nu_{\text{obs}} / \text{MHz}$ | $\nu_{\text{obs}} - \nu_{\text{calc}} / \text{MHz}$ |
|------|--------|--------|-------|---------|---------|---------------------------------|-----------------------------------------------------|
| 3    | 2      | 2      | 2     | 1       | 1       | 6618.4920                       | -0.0010                                             |
| 3    | 2      | 1      | 2     | 1       | 2       | 7278.5833                       | -0.0002                                             |
| 3    | 3      | 1      | 2     | 2       | 0       | 7484.9149                       | 0.0035                                              |
| 4    | 1      | 4      | 3     | 0       | 3       | 7496.5404                       | -0.0009                                             |
| 4    | 2      | 3      | 3     | 1       | 2       | 8341.3644                       | 0.0001                                              |
| 5    | 1      | 5      | 4     | 0       | 4       | 9263.4047                       | 0.0021                                              |
| 4    | 3      | 2      | 3     | 2       | 1       | 9338.2528                       | 0.0057                                              |
| 5    | 1      | 4      | 4     | 2       | 3       | 9426.4593                       | 0.0003                                              |
| 5    | 2      | 4      | 4     | 1       | 3       | 10015.3968                      | -0.0037                                             |
| 4    | 4      | 1      | 3     | 3       | 0       | 10120.7320                      | 0.0030                                              |
| 4    | 4      | 0      | 3     | 3       | 1       | 10132.8746                      | -0.0109                                             |
| 5    | 5      | 1      | 4     | 4       | 0       | 12738.4876                      | 0.0031                                              |
| 5    | 5      | 0      | 4     | 4       | 1       | 12740.5974                      | -0.0008                                             |

**Table S3** Principal axis coordinates of 1,2-DFBZ...HCCH and estimated uncertainties resulting from least-squares fit of moments of inertia. The numbering used in Figure 3 of the manuscript is also given

| ATOM <sup>a)</sup> | Fig. 3 numbering | <i>a</i> | <i>da</i> <sup>b)</sup> | <i>b</i> | <i>db</i> | <i>c</i> | <i>dc</i> |
|--------------------|------------------|----------|-------------------------|----------|-----------|----------|-----------|
| X1                 |                  | -0.26271 | 0.01605                 | -1.54354 | 0.00096   | 0        | 0         |
| X2                 |                  | -0.54958 | 0.00581                 | -0.58557 | 0.00402   | 0        | 0         |
| C3                 | C4               | -0.54958 | 0.00581                 | -0.58557 | 0.00402   | 0.68775  | 0         |
| F4                 | F16              | -0.21154 | 0.01788                 | -1.71442 | 0.00041   | 1.34525  | 0         |
| C5                 | C3               | -0.54958 | 0.00581                 | -0.58557 | 0.00402   | -0.68775 | 0         |
| F6                 | F15              | -0.21154 | 0.01788                 | -1.71442 | 0.00041   | -1.34525 | 0         |
| C7                 | C5               | -0.88797 | 0.00628                 | 0.54443  | 0.00764   | 1.40128  | 0         |
| H8                 | H9               | -0.87935 | 0.00597                 | 0.51564  | 0.00755   | 2.48377  | 0         |
| C9                 | C2               | -0.88797 | 0.00628                 | 0.54443  | 0.00764   | -1.40128 | 0         |
| H10                | H8               | -0.87935 | 0.00597                 | 0.51564  | 0.00755   | -2.48377 | 0         |
| C11                | C6               | -1.23504 | 0.01867                 | 1.70342  | 0.01135   | 0.69601  | 0         |
| H12                | H10              | -1.50310 | 0.02824                 | 2.59859  | 0.01422   | 1.24009  | 0         |
| C13                | C1               | -1.23504 | 0.01867                 | 1.70342  | 0.01135   | -0.69601 | 0         |
| H14                | H7               | -1.50310 | 0.02824                 | 2.59859  | 0.01422   | -1.24009 | 0         |
| X15                | X18              | -0.88797 | 0.00628                 | 0.54443  | 0.00764   | 0        | 0         |
| X16                | X17              | 2.95907  | 0.00581                 | 0.72921  | 0.02352   | 0        | 0         |
| C17                | C13              | 3.44715  | 0.01111                 | 0.37767  | 0.01637   | 0        | 0         |
| X18                |                  | 4.03159  | 0.00207                 | 1.18911  | 0.00860   | 0        | 0         |
| X19                |                  | 4.89252  | 0.00821                 | 0.56903  | 0.00896   | 0        | 0         |
| H20                | H14              | 4.30809  | 0.02057                 | -0.24241 | 0.00616   | 0        | 0         |
| H21                | H11              | 1.61005  | 0.00939                 | 1.70083  | 0.04386   | 0        | 0         |
| X22                |                  | 2.19448  | 0.02176                 | 2.51227  | 0.03500   | 0        | 0         |
| X23                |                  | 3.05542  | 0.01230                 | 1.89219  | 0.02209   | 0        | 0         |
| C24                | C12              | 2.47099  | 0.00151                 | 1.08075  | 0.03082   | 0        | 0         |
| X25                | X19              | -0.67512 | 0.00133                 | -0.16637 | 0.00537   | 0        | 0         |

<sup>a)</sup> X are dummy atoms.

<sup>b)</sup> *da*, *db*, and *dc* are uncertainties reported in STRFIT program based on propagated errors from fitted structural parameters only.

**Table S4**  $\omega$ B97X-D/aug-cc-pVDZ (BSSE corrected) predicted principal axis coordinates (Å) of the non-planar and planar forms of 1,2-DFBZ...HCCH. The numbering scheme in Table S4a follows that of Figure 3 of the manuscript.

**Table S4a** Predicted non-planar form of 1,2-DFBZ...HCCH

|     | <i>a</i> | <i>b</i> | <i>c</i> |
|-----|----------|----------|----------|
| C1  | -1.1385  | -1.7528  | -0.7005  |
| C2  | -0.8424  | -0.5844  | -1.4041  |
| C3  | -0.5624  | 0.5758   | -0.6997  |
| C4  | -0.5753  | 0.5792   | 0.6923   |
| C5  | -0.8681  | -0.5779  | 1.3971   |
| C6  | -1.1513  | -1.7495  | 0.6939   |
| H7  | -1.3611  | -2.6671  | -1.2488  |
| H8  | -0.8207  | -0.5607  | -2.4924  |
| H9  | -0.8657  | -0.5477  | 2.4854   |
| H10 | -1.3833  | -2.6616  | 1.2422   |
| H11 | 1.6018   | -1.6202  | 0.0209   |
| C12 | 2.4735   | -0.9942  | 0.0176   |
| C13 | 3.4431   | -0.2748  | 0.0136   |
| H14 | 4.3053   | 0.3611   | 0.0095   |
| F15 | -0.2726  | 1.7102   | -1.3532  |
| F16 | -0.2975  | 1.7164   | 1.3459   |

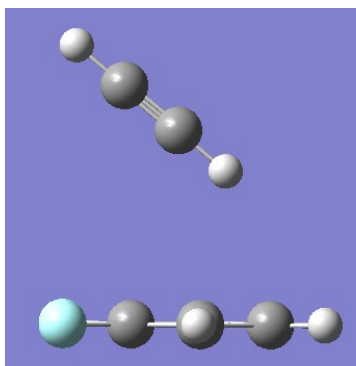

**Table S4b** Predicted planar form of 1,2-DFBZ...HCCH

|     | <i>a</i> | <i>b</i> | <i>c</i> |
|-----|----------|----------|----------|
| C1  | -1.8433  | -1.8731  | 0.0000   |
| C2  | -0.4565  | -2.0130  | 0.0000   |
| C3  | 0.3667   | -0.8867  | 0.0000   |
| C4  | -0.2173  | 0.3699   | 0.0000   |
| C5  | -1.6014  | 0.5123   | 0.0000   |
| C6  | -2.4227  | -0.6042  | 0.0000   |
| H7  | -2.4825  | -2.7548  | 0.0000   |
| H8  | -0.0067  | -3.0049  | 0.0000   |
| H9  | 1.4533   | -0.9683  | 0.0000   |
| H10 | -3.5028  | -0.4654  | 0.0000   |
| F11 | -2.1336  | 1.7457   | 0.0000   |
| F12 | 0.5510   | 1.4767   | 0.0000   |
| H13 | 5.2237   | -1.3116  | 0.0000   |
| C14 | 4.5526   | -0.4761  | 0.0000   |
| C15 | 3.8070   | 0.4737   | 0.0000   |
| H16 | 3.1321   | 1.3074   | 0.0000   |

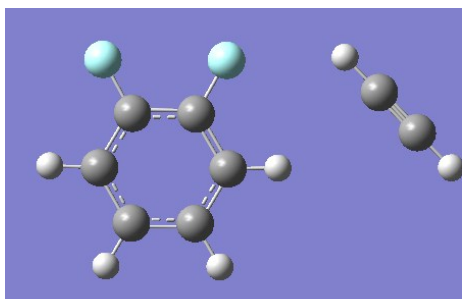

Supplement: c6cp04737h1.pdf [file c6cp04737h1.pdf]
